# Supplementary material
Source: Royal Society of Chemistry journal article supplement (doi:10.1039/d5bm01465d)
Supplement: d5bm01465d1.pdf [file d5bm01465d1.pdf]

## **Biofabrication of 3D-printed fibrous scaffolds for large muscle tissue engineering: enhancing scalability, myotube formation and surgical handling**

Eva Schätzlein, Oliver Weeger, Sebastian Scholpp, Leon Faulhaber, Anna Fritschen, Jamina Sofie Gerhardus, Robin Maatz, Annabelle Neuhäusler, Souraj Mandal, Regine von Klitzing, Andreas Blaeser

Eva Schätzlein, Sebastian Scholpp, Leon Faulhaber, Anna Fritschen, Jamina Sophie Gerhardus, Robin Maatz, Annabelle Neuhäusler, Andreas Blaeser

Institute for BioMedical Printing Technologies,  
Technical University of Darmstadt,  
64289 Darmstadt, Germany  
E-mail: blaeser@idd.tu-darmstadt.de

Oliver Weeger

Cyber-Physical Simulation Group, Department of Mechanical Engineering & Center for Computational Engineering,  
Technical University of Darmstadt,  
64293 Darmstadt, Germany

Souraj Mandal, Regine von Klitzing

Soft Matter at Interfaces, Department of Physics,  
Technical University of Darmstadt,  
64289 Darmstadt, Germany

Andreas Blaeser

Centre for Synthetic Biology,  
Technical University of Darmstadt,  
64289 Darmstadt, Germany

## Supporting Information

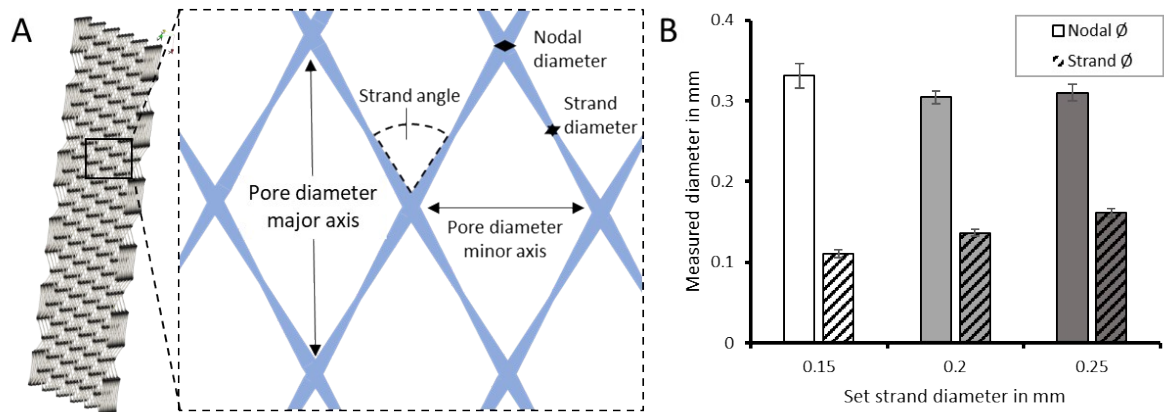

Figure S1 (A) Scaffold design parameters and (B) analysis of the measured diameter compared to the set strand diameter.

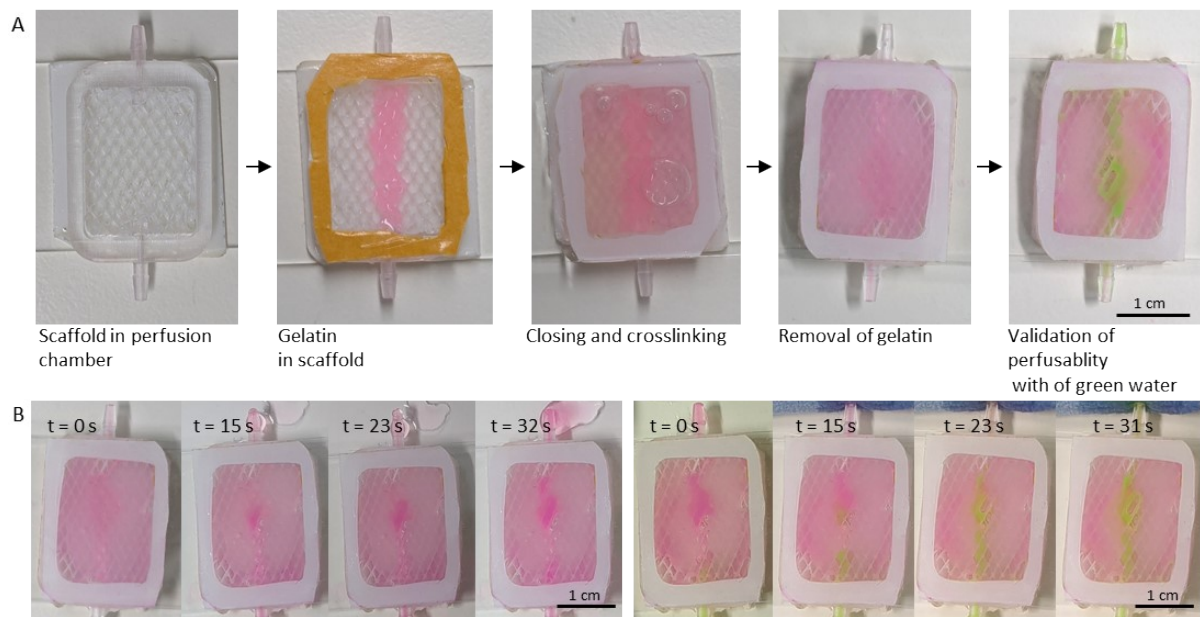

Figure S2 (A) Fabrication of a perfusable sacrificial gelatin channel in the collagen-matrigel matrix in the printed scaffold. (B) Removal of the gelatin channel by perfusion of pink water at 37°C, 50 µl/min, and visualization of the perfusion with green water at 37°C, 50 µl/min.

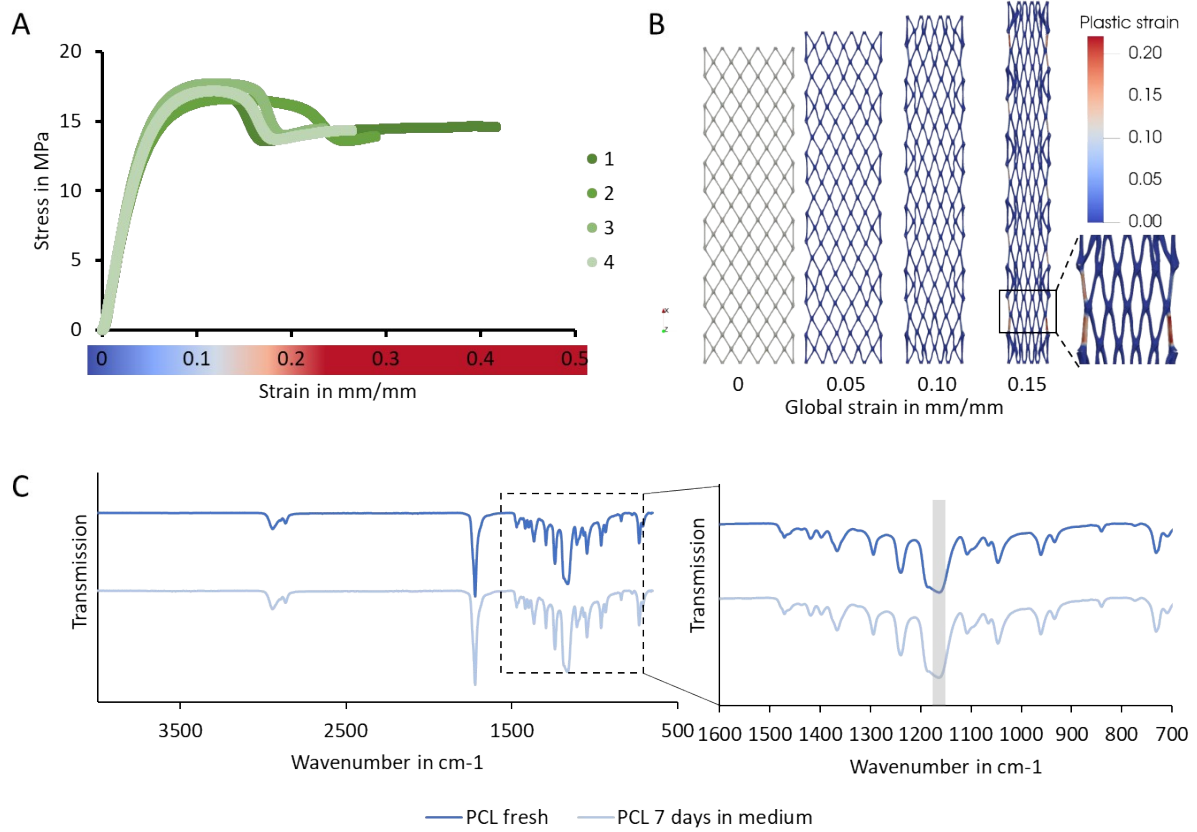

Figure S3. (A) Tensile testing of PCL bulk material ( $n=4$ ) and (B) simulation of local plastic deformation with applied global strain of up to 15% strain. (C) FTIR analysis of PCL before and after 7 days incubation in growth medium at 37°C.

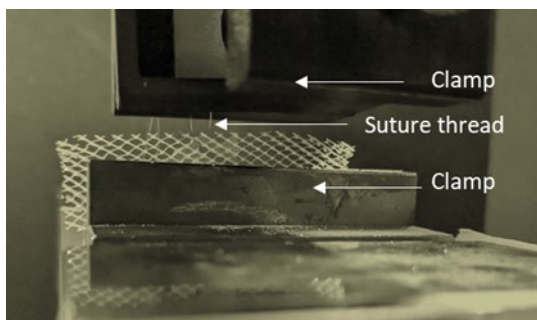

Figure S4. Experimental setup of the suture retention test utilized to measure the maximal retention force.

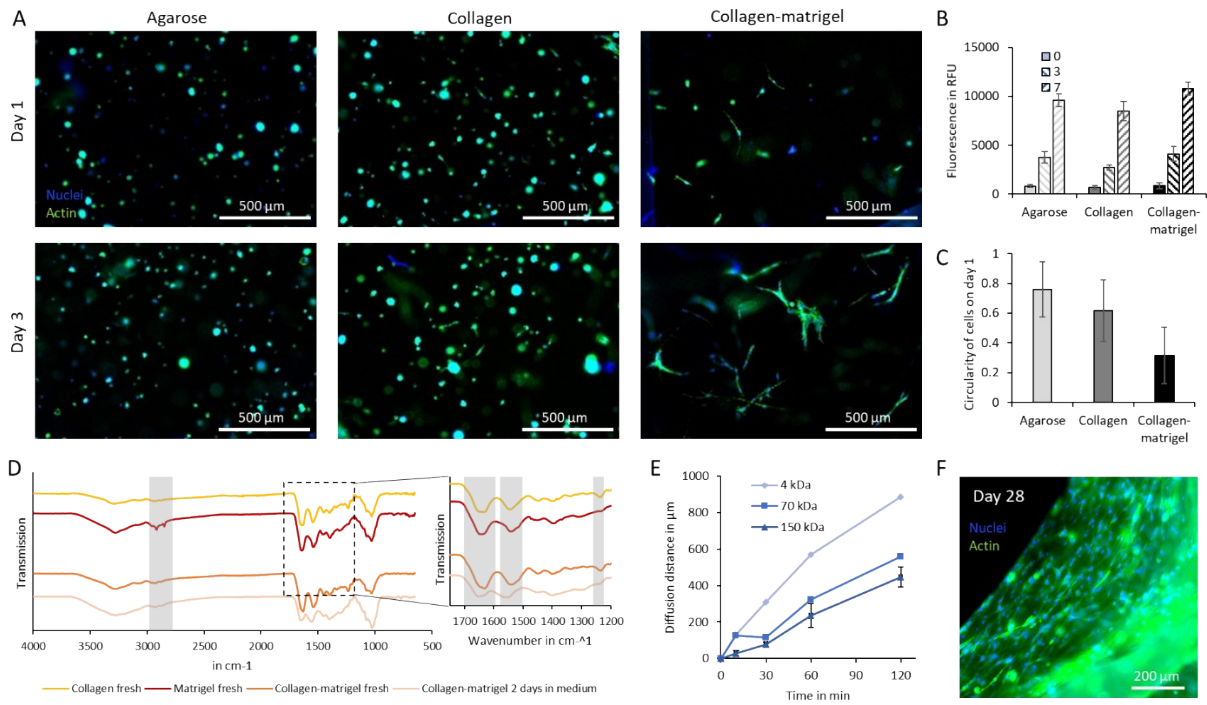

**Figure S5.** C2C12 in growth media in 0.5 mg/ml agarose, 0.3 mg/ml collagen and 0.3 mg/ml collagen-0.17 ml/ml matrigel. (A) Microscopic images of the cells on day 1 and day 3 after seeding in the gel (nuclei: blue, actin: green) and (B) metabolic activity measured with a cell titer blue assay on day 0, 3 and 7 after seeding (n = 3). (C) Quantification of cell morphology on day 1 with a perfectly round cell assigned to the value 1 (n=3, number of cells analyzed per group n>134). (D) Diffusion of different sizes in collagen-matrigel. (E) FTIR spectra of bioink components and their mixture before and after 2 day incubation in growth media at 37 °C. (F) Microscopy of the cells in collagen-matrigel in the scaffold after 28 days in differentiation media (nuclei: blue, actin: green).

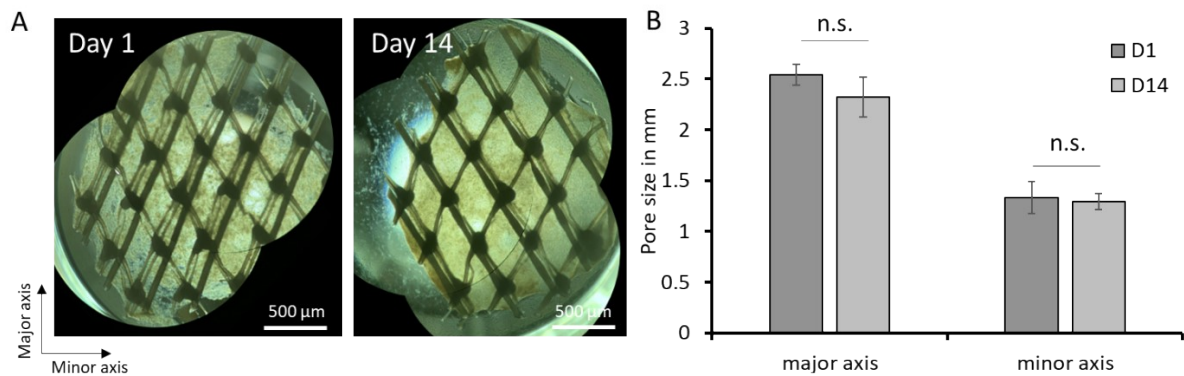

**Figure S6.** (A) Microscopic images of C2C12 differentiation over the course of 14 days in collagen-matrigel in the scaffolds and (B) quantification of scaffold pore sizes (n = 5, statistical significance\* for p < 0.05 with n.s. for no significance).

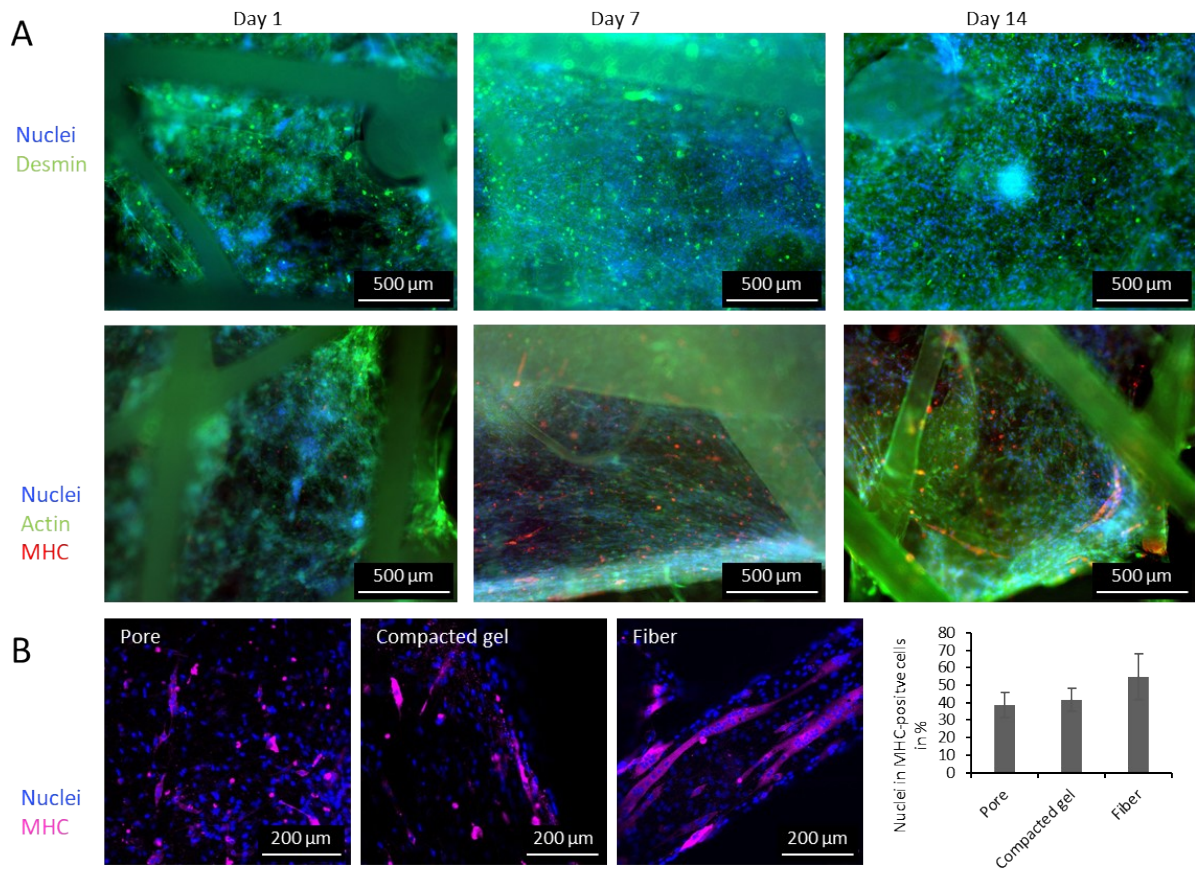

Figure S7. 3D cell culture of C2C12 myoblasts in a 0.3 mg/ml collagen-0.17 mg/mg matrigel hydrogel in scaffolds and differentiation into myotubes. (A) Fluorescence microscopy of samples cultured in differentiation media for 1, 7 and 14 days and staining for early differentiation marker desmin (nuclei: blue, desmin: green) and staining for later stage differentiation marker myosin heavy chain 4 (MHC)(nuclei: blue, actin: green, myosin heavy chain-4: red). (B) Fluorescence microscopy of day 14 of differentiation in different areas of a cell seeded scaffold(nuclei: blue, myosin heavy chain-4: magenta) and quantification of percentage of nuclei in MHC positive cells ( $n = 3$ ,  $N=1$ , statistical significance\* for  $p < 0.05$ ).

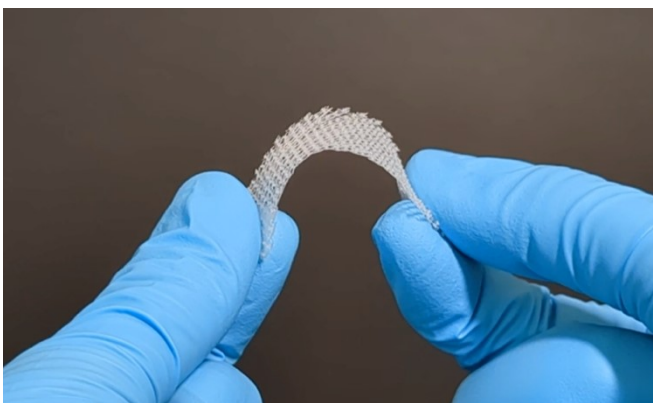

Video S1. Handling of scaffolds.

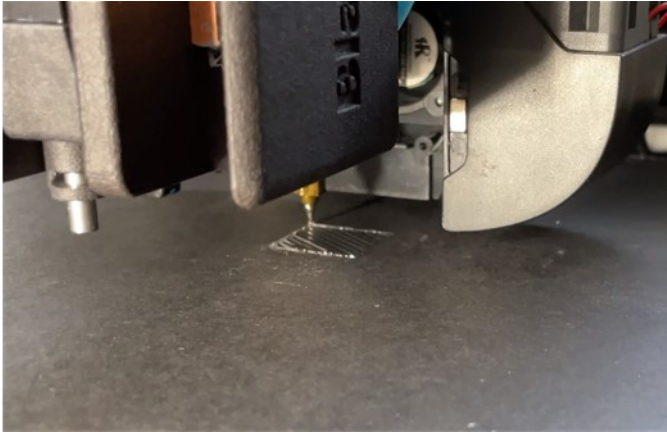

*Video S2. Visualization of the FFF-spinning and subsequent drop on demand bioprinting process.*

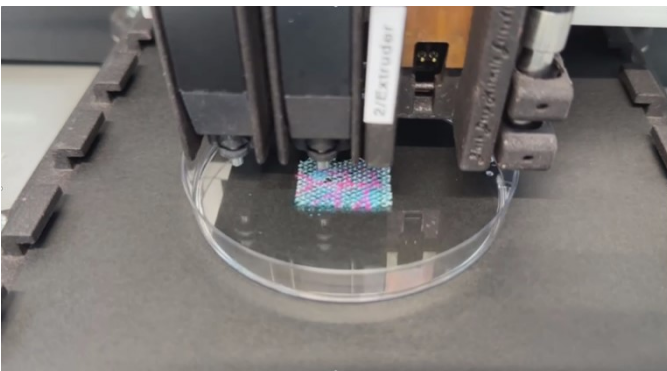

*Video S3. Visualization of the drop on demand bioprinting into the scaffold using multiple bioinks.*
